# Supplementary material
Source: PubMed Central journal article supplement (PMC6706292)
Supplement: NIHMS1035696-supplement-Supplemental_Material.pdf [file NIHMS1035696-supplement-Supplemental_Material.pdf]

Table S1  
Retention over 8 Waves of Longitudinal study

|    | N at given wave<br>(total # participated<br>at each wave) | # new participants<br>(first participated<br>at given wave) | Percentage of<br>full sample<br>(Wave N/1897) | Percentage of<br>previous wave<br>(Wave N/Wave N – 1) |
|----|-----------------------------------------------------------|-------------------------------------------------------------|-----------------------------------------------|-------------------------------------------------------|
| W1 | 1,843                                                     | 1,843                                                       | 97.2%                                         | ---                                                   |
| W2 | 1,806                                                     | 54                                                          | 95.2%                                         | 92.4%                                                 |
| W3 | 1,770                                                     | ---                                                         | 93.3%                                         | 98.0%                                                 |
| W4 | 1,667                                                     | ---                                                         | 87.9%                                         | 94.2%                                                 |
| W5 | 1,683                                                     | ---                                                         | 86.3%                                         | 98.3%                                                 |
| W6 | 1,563                                                     | ---                                                         | 82.4%                                         | 95.4%                                                 |
| W7 | 1,495                                                     | ---                                                         | 78.8%                                         | 95.6%                                                 |
| W8 | 1,428                                                     | ---                                                         | 75.3%                                         | 95.6%                                                 |

W = wave. For example, W1 = wave 1. Wave 1: spring, 5<sup>th</sup> grade; Wave 2: fall, 6<sup>th</sup> grade; Wave 3: spring, 6<sup>th</sup> grade; Wave 4: fall, 7<sup>th</sup> grade; Wave 5: spring, 7<sup>th</sup> grade; Wave 6: fall, 8<sup>th</sup> grade; Wave 7: spring, 8<sup>th</sup> grade; Wave 8: spring, 9<sup>th</sup> grade; Wave 9. A total of 54 youth were in the study but were absent from school during all testing days at wave 1, so began at wave 2.

Table S2. Summary of Hierarchical Regression for LPxNA predicting Negative Urgency for Boys (N=956)

| Wave 1           |         |              |         |              |
|------------------|---------|--------------|---------|--------------|
|                  | Step 1  |              | Step 2  |              |
|                  | $\beta$ | $\Delta R^2$ | $\beta$ | $\Delta R^2$ |
| Lack of Planning | .34**   | .23*         | .34**   | .00          |
| Negative Affect  | .30**   |              | .30**   |              |
| LPxNA            | --      |              | -.03    |              |
| Wave 2           |         |              |         |              |
|                  | Step 1  |              | Step 2  |              |
|                  | $\beta$ | $\Delta R^2$ | $\beta$ | $\Delta R^2$ |
| Lack of Planning | .28**   | .18**        | .29**   | .01*         |
| Negative Affect  | .27**   |              | .28**   |              |
| LPxNA            | --      |              | -.10*   |              |
| Wave 3           |         |              |         |              |
|                  | Step 1  |              | Step 2  |              |
|                  | $\beta$ | $\Delta R^2$ | $\beta$ | $\Delta R^2$ |
| Lack of Planning | .31**   | .20**        | .31**   | .01*         |
| Negative Affect  | .28**   |              | .29**   |              |
| LPxNA            | --      |              | -.09*   |              |
| Wave 4           |         |              |         |              |
|                  | Step 1  |              | Step 2  |              |
|                  | $\beta$ | $\Delta R^2$ | $\beta$ | $\Delta R^2$ |
| Lack of Planning | .30**   | .21**        | .30**   | .00          |
| Negative Affect  | .31**   |              | .31**   |              |
| LPxNA            | --      |              | -.03    |              |
| Wave 5           |         |              |         |              |
|                  | Step 1  |              | Step 2  |              |
|                  | $\beta$ | $\Delta R^2$ | $\beta$ | $\Delta R^2$ |
| Lack of Planning | .24**   | .21**        | .24**   | .01*         |
| Negative Affect  | .35**   |              | .37**   |              |
| LPxNA            | --      |              | -.10*   |              |
| Wave 6           |         |              |         |              |
|                  | Step 1  |              | Step 2  |              |
|                  | $\beta$ | $\Delta R^2$ | $\beta$ | $\Delta R^2$ |
| Lack of Planning | .25**   | .20**        | .25**   | .00          |
| Negative Affect  | .34**   |              | .33**   |              |
| LPxNA            | --      |              | .04     |              |
| Wave 7           |         |              |         |              |
|                  | Step 1  |              | Step 2  |              |
|                  | $\beta$ | $\Delta R^2$ | $\beta$ | $\Delta R^2$ |
| Lack of Planning | .14**   | .19**        | .14**   | .00          |
| Negative Affect  | .40**   |              | .40**   |              |
| LPxNA            | --      |              | .01     |              |

| Wave 8           |         |              |         |              |
|------------------|---------|--------------|---------|--------------|
|                  | Step 1  |              | Step 2  |              |
|                  | $\beta$ | $\Delta R^2$ | $\beta$ | $\Delta R^2$ |
| Lack of Planning | .05     | .22**        | .05     | .01*         |
| Negative Affect  | .46**   |              | .46**   |              |
| LPxNA            | --      |              | -.09*   |              |

Note. \* =  $p < .01$ , \*\* =  $p < .001$ .

Table S3. Summary of Hierarchical Regression for LPxNA predicting Negative Urgency for Girls (N=925)

| Wave 1           |         |              |         |              |
|------------------|---------|--------------|---------|--------------|
|                  | Step 1  |              | Step 2  |              |
|                  | $\beta$ | $\Delta R^2$ | $\beta$ | $\Delta R^2$ |
| Lack of Planning | .30**   | .24**        | .30**   | .00          |
| Negative Affect  | .36**   |              | .36**   |              |
| LPxNA            | -       |              | -.02    |              |
| Wave 2           |         |              |         |              |
|                  | Step 1  |              | Step 2  |              |
|                  | $\beta$ | $\Delta R^2$ | $\beta$ | $\Delta R^2$ |
| Lack of Planning | .31**   | .20**        | .31**   | .00          |
| Negative Affect  | .29**   |              | .29**   |              |
| LPxNA            | -       |              | -.01    |              |
| Wave 3           |         |              |         |              |
|                  | Step 1  |              | Step 2  |              |
|                  | $\beta$ | $\Delta R^2$ | $\beta$ | $\Delta R^2$ |
| Lack of Planning | .26**   | .18**        | .26**   | .01*         |
| Negative Affect  | .29**   |              | .31**   |              |
| LPxNA            | -       |              | -.09*   |              |
| Wave 4           |         |              |         |              |
|                  | Step 1  |              | Step 2  |              |
|                  | $\beta$ | $\Delta R^2$ | $\beta$ | $\Delta R^2$ |
| Lack of Planning | .30**   | .24**        | .30**   | .01*         |
| Negative Affect  | .35**   |              | .36**   |              |
| LPxNA            | -       |              | -.08*   |              |
| Wave 5           |         |              |         |              |
|                  | Step 1  |              | Step 2  |              |
|                  | $\beta$ | $\Delta R^2$ | $\beta$ | $\Delta R^2$ |
| Lack of Planning | .25**   | .18**        | .24**   | .02**        |
| Negative Affect  | .31**   |              | .34**   |              |
| LPxNA            | -       |              | -.15**  |              |
| Wave 6           |         |              |         |              |
|                  | Step 1  |              | Step 2  |              |
|                  | $\beta$ | $\Delta R^2$ | $\beta$ | $\Delta R^2$ |
| Lack of Planning | .29**   | .23**        | .29**   | .01*         |
| Negative Affect  | .34**   |              | .35**   |              |
| LPxNA            | -       |              | -.08*   |              |
| Wave 7           |         |              |         |              |
|                  | Step 1  |              | Step 2  |              |
|                  | $\beta$ | $\Delta R^2$ | $\beta$ | $\Delta R^2$ |
| Lack of Planning | .13**   | .16**        | .13**   | .01*         |
| Negative Affect  | .37**   |              | .38**   |              |
| LPxNA            | -       |              | -.09*   |              |

| Wave 8           |         |              |         |              |
|------------------|---------|--------------|---------|--------------|
|                  | Step 1  |              | Step 2  |              |
|                  | $\beta$ | $\Delta R^2$ | $\beta$ | $\Delta R^2$ |
| Lack of Planning | .01     | .18**        | .01     | .02**        |
| Negative Affect  | .42**   |              | .45**   |              |
| LPxNA            | -       |              | -.13**  |              |

Note. \* =  $p < .01$ , \*\* =  $p < .001$ .

Table S4. Summary of Hierarchical Regression for LPxPA predicting Positive Urgency for Boys (N=956)

| Wave 1           |         |              |         |              |
|------------------|---------|--------------|---------|--------------|
|                  | Step 1  |              | Step 2  |              |
|                  | $\beta$ | $\Delta R^2$ | $\beta$ | $\Delta R^2$ |
| Lack of Planning | .32**   | .09**        | .32**   | .00          |
| Positive Affect  | .05     |              | .04     |              |
| LPxPA            | -       |              | .07     |              |
| Wave 2           |         |              |         |              |
|                  | Step 1  |              | Step 2  |              |
|                  | $\beta$ | $\Delta R^2$ | $\beta$ | $\Delta R^2$ |
| Lack of Planning | .31**   | .09**        | .32**   | .01*         |
| Positive Affect  | .11*    |              | .09*    |              |
| LPxPA            | -       |              | .10*    |              |
| Wave 3           |         |              |         |              |
|                  | Step 1  |              | Step 2  |              |
|                  | $\beta$ | $\Delta R^2$ | $\beta$ | $\Delta R^2$ |
| Lack of Planning | .35**   | .12**        | .35**   | .01          |
| Positive Affect  | .16**   |              | .16**   |              |
| LPxPA            | -       |              | .07     |              |
| Wave 4           |         |              |         |              |
|                  | Step 1  |              | Step 2  |              |
|                  | $\beta$ | $\Delta R^2$ | $\beta$ | $\Delta R^2$ |
| Lack of Planning | .31**   | .10**        | .31**   | .01*         |
| Positive Affect  | .03     |              | .02     |              |
| LPxPA            | -       |              | .09*    |              |
| Wave 5           |         |              |         |              |
|                  | Step 1  |              | Step 2  |              |
|                  | $\beta$ | $\Delta R^2$ | $\beta$ | $\Delta R^2$ |
| Lack of Planning | .32**   | .10**        | .33**   | .01          |
| Positive Affect  | .05     |              | .05     |              |
| LPxPA            | -       |              | .08     |              |
| Wave 6           |         |              |         |              |
|                  | Step 1  |              | Step 2  |              |
|                  | $\beta$ | $\Delta R^2$ | $\beta$ | $\Delta R^2$ |
| Lack of Planning | .34**   | .11**        | .34**   | .00          |
| Positive Affect  | .02     |              | .02     |              |
| LPxPA            | -       |              | .02     |              |
| Wave 7           |         |              |         |              |
|                  | Step 1  |              | Step 2  |              |
|                  | $\beta$ | $\Delta R^2$ | $\beta$ | $\Delta R^2$ |
| Lack of Planning | .27**   | .07**        | .27**   | .00          |
| Positive Affect  | .02     |              | .01     |              |
| LPxPA            | -       |              | .02     |              |

| Wave 8           |         |              |         |              |
|------------------|---------|--------------|---------|--------------|
|                  | Step 1  |              | Step 2  |              |
|                  | $\beta$ | $\Delta R^2$ | $\beta$ | $\Delta R^2$ |
| Lack of Planning | .21**   | .05**        | .21**   | .00          |
| Positive Affect  | .09*    |              | .09*    |              |
| LPxPA            | -       |              | .03     |              |

Note. \* =  $p < .01$ , \*\* =  $p < .001$ .

Table S5. Summary of Hierarchical Regression for LPxPA predicting Positive Urgency for Girls (N=925)

| Wave 1           |         |              |         |              |
|------------------|---------|--------------|---------|--------------|
|                  | Step 1  |              | Step 2  |              |
|                  | $\beta$ | $\Delta R^2$ | $\beta$ | $\Delta R^2$ |
| Lack of Planning | .33**   | .20**        | .34**   | .01          |
| Positive Affect  | .08*    |              | .08     |              |
| LPxPA            | -       |              | .08     |              |
| Wave 2           |         |              |         |              |
|                  | Step 1  |              | Step 2  |              |
|                  | $\beta$ | $\Delta R^2$ | $\beta$ | $\Delta R^2$ |
| Lack of Planning | .34**   | .11**        | .34**   | .02**        |
| Positive Affect  | .08     |              | .06     |              |
| LPxPA            | -       |              | .15**   |              |
| Wave 3           |         |              |         |              |
|                  | Step 1  |              | Step 2  |              |
|                  | $\beta$ | $\Delta R^2$ | $\beta$ | $\Delta R^2$ |
| Lack of Planning | .31**   | .09**        | .32**   | .01**        |
| Positive Affect  | .09*    |              | .07     |              |
| LPxPA            | -       |              | .12**   |              |
| Wave 4           |         |              |         |              |
|                  | Step 1  |              | Step 2  |              |
|                  | $\beta$ | $\Delta R^2$ | $\beta$ | $\Delta R^2$ |
| Lack of Planning | .33**   | .11**        | .33**   | .02**        |
| Positive Affect  | .01     |              | -.01    |              |
| LPxPA            | -       |              | .14**   |              |
| Wave 5           |         |              |         |              |
|                  | Step 1  |              | Step 2  |              |
|                  | $\beta$ | $\Delta R^2$ | $\beta$ | $\Delta R^2$ |
| Lack of Planning | .27**   | .07**        | .27**   | .01          |
| Positive Affect  | .05     |              | .05     |              |
| LPxPA            | -       |              | .07     |              |
| Wave 6           |         |              |         |              |
|                  | Step 1  |              | Step 2  |              |
|                  | $\beta$ | $\Delta R^2$ | $\beta$ | $\Delta R^2$ |
| Lack of Planning | .30**   | .09**        | .29**   | .02**        |
| Positive Affect  | .09*    |              | .10**   |              |
| LPxPA            | -       |              | .14**   |              |
| Wave 7           |         |              |         |              |
|                  | Step 1  |              | Step 2  |              |
|                  | $\beta$ | $\Delta R^2$ | $\beta$ | $\Delta R^2$ |
| Lack of Planning | .15**   | .03**        | .15**   | .02**        |
| Positive Affect  | .10*    |              | .10*    |              |
| LPxPA            | -       |              | .15**   |              |

| Wave 8           |         |              |         |              |
|------------------|---------|--------------|---------|--------------|
|                  | Step 1  |              | Step 2  |              |
|                  | $\beta$ | $\Delta R^2$ | $\beta$ | $\Delta R^2$ |
| Lack of Planning | .15**   | .02          | .15**   | .01          |
| Positive Affect  | .05     |              | .03     |              |
| LPxPA            | -       |              | .07     |              |

Note. \* =  $p < .01$ , \*\* =  $p < .001$ .

Table S6. Summary of Hierarchical Regression for Negative Urgency versus LPxNA predicting drinking for Boys (N=956)

| Wave 1 → Wave 2  |         |              |         |              |         |              |         |              |
|------------------|---------|--------------|---------|--------------|---------|--------------|---------|--------------|
|                  | Step 1  |              | Step 2  |              | Step 3  |              | Step 4  |              |
|                  | $\beta$ | $\Delta R^2$ |
| Drinking         | .42**   | .18**        | .41**   | .01*         | .41**   | .00          | .39**   | .01**        |
| Lack of Planning | -       |              | .09*    |              | .09*    |              | .05     |              |
| Negative Affect  | -       |              | -.04    |              | -.04    |              | -.07    |              |
| LPxNA            | -       |              | -       |              | -.03    |              | -.03    |              |
| Negative Urgency | -       |              | -       |              | -       |              | .12**   |              |
| Wave 2 → Wave 3  |         |              |         |              |         |              |         |              |
|                  | Step 1  |              | Step 2  |              | Step 3  |              | Step 4  |              |
|                  | $\beta$ | $\Delta R^2$ |
| Drinking         | .38**   | .15**        | .37**   | .01          | .37**   | .00          | .36**   | .01*         |
| Lack of Planning | -       |              | .06     |              | .06     |              | .03     |              |
| Negative Affect  | -       |              | .05     |              | .05     |              | .02     |              |
| LPxNA            | -       |              | -       |              | .01     |              | .02     |              |
| Negative Urgency | -       |              | -       |              | -       |              | .10*    |              |
| Wave 3 → Wave 4  |         |              |         |              |         |              |         |              |
|                  | Step 1  |              | Step 2  |              | Step 3  |              | Step 4  |              |
|                  | $\beta$ | $\Delta R^2$ |
| Drinking         | .41**   | .17**        | .39**   | .01**        | .39**   | .00          | .39**   | .00          |
| Lack of Planning | -       |              | .12**   |              | .12**   |              | .11**   |              |
| Negative Affect  | -       |              | -.02    |              | -.02    |              | -.03    |              |
| LPxNA            | -       |              | -       |              | .02     |              | .02     |              |
| Negative Urgency | -       |              | -       |              | -       |              | .05     |              |
| Wave 4 → Wave 5  |         |              |         |              |         |              |         |              |
|                  | Step 1  |              | Step 2  |              | Step 3  |              | Step 4  |              |
|                  | $\beta$ | $\Delta R^2$ |
| Drinking         | .54**   | .29**        | .53**   | .01*         | .53**   | .00          | .52**   | .00          |
| Lack of Planning | -       |              | .10**   |              | .09**   |              | .08*    |              |
| Negative Affect  | -       |              | -.02    |              | -.02    |              | -.04    |              |
| LPxNA            | -       |              | -       |              | .03     |              | .03     |              |
| Negative Urgency | -       |              | -       |              | -       |              | .06     |              |
| Wave 5 → Wave 6  |         |              |         |              |         |              |         |              |
|                  | Step 1  |              | Step 2  |              | Step 3  |              | Step 4  |              |
|                  | $\beta$ | $\Delta R^2$ |
| Drinking         | .54**   | .29**        | .52**   | .01          | .52**   | .00          | .50**   | .01**        |
| Lack of Planning | -       |              | .07     |              | .07     |              | .04     |              |
| Negative Affect  | -       |              | .04     |              | .05     |              | .00     |              |
| LPxNA            | -       |              | -       |              | -.05    |              | -.03    |              |
| Negative Urgency | -       |              | -       |              | -       |              | .13**   |              |

| Wave 6 → Wave 7  |         |              |         |              |         |              |         |              |
|------------------|---------|--------------|---------|--------------|---------|--------------|---------|--------------|
|                  | Step 1  |              | Step 2  |              | Step 3  |              | Step 4  |              |
|                  | $\beta$ | $\Delta R^2$ |
| Drinking         | .57**   | .32**        | .55**   | .01**        | .55**   | .00          | .54**   | .01*         |
| Lack of Planning | -       |              | .11**   |              | .11**   |              | .09*    |              |
| Negative Affect  | -       |              | -.07    |              | -.07    |              | -.09*   |              |
| LPxNA            | -       |              | -       |              | .01     |              | .01     |              |
| Negative Urgency | -       |              | -       |              | -       |              | .08*    |              |
| Wave 7 → Wave 8  |         |              |         |              |         |              |         |              |
|                  | Step 1  |              | Step 2  |              | Step 3  |              | Step 4  |              |
|                  | $\beta$ | $\Delta R^2$ |
| Drinking         | .49**   | .24**        | .46**   | .02**        | .46**   | .00          | .44**   | .01*         |
| Lack of Planning | -       |              | .13**   |              | .13**   |              | .12**   |              |
| Negative Affect  | -       |              | .03     |              | .03     |              | -.01    |              |
| LPxNA            | -       |              | -       |              | .00     |              | .00     |              |
| Negative Urgency | -       |              | -       |              | -       |              | .10*    |              |

Table S7. Summary of Hierarchical Regression for Negative Urgency versus LPxNA predicting drinking for Girls (N=925)

| Wave 1 → Wave 2  |         |              |         |              |         |              |         |              |
|------------------|---------|--------------|---------|--------------|---------|--------------|---------|--------------|
|                  | Step 1  |              | Step 2  |              | Step 3  |              | Step 4  |              |
|                  | $\beta$ | $\Delta R^2$ |
| Drinking         | .46**   | .21**        | .44**   | .02**        | .44**   | .00          | .43**   | .01          |
| Lack of Planning | -       |              | .13**   |              | .13**   |              | .11**   |              |
| Negative Affect  | -       |              | -.05    |              | -.04    |              | -.07    |              |
| LPxNA            | -       |              | -       |              | -.02    |              | -.02    |              |
| Negative Urgency | -       |              | -       |              | -       |              | .08     |              |
| Wave 2 → Wave 3  |         |              |         |              |         |              |         |              |
|                  | Step 1  |              | Step 2  |              | Step 3  |              | Step 4  |              |
|                  | $\beta$ | $\Delta R^2$ |
| Drinking         | .45**   | .20**        | .42**   | .01*         | .42**   | .00          | .40**   | .02**        |
| Lack of Planning | -       |              | .09*    |              | .09*    |              | .05     |              |
| Negative Affect  | -       |              | .04     |              | .03     |              | -.01    |              |
| LPxNA            | -       |              | -       |              | .04     |              | .04     |              |
| Negative Urgency | -       |              | -       |              | -       |              | .14**   |              |
| Wave 3 → Wave 4  |         |              |         |              |         |              |         |              |
|                  | Step 1  |              | Step 2  |              | Step 3  |              | Step 4  |              |
|                  | $\beta$ | $\Delta R^2$ |
| Drinking         | .55**   | .30**        | .52**   | .01**        | .52**   | .00          | .52**   | .00          |
| Lack of Planning | -       |              | .08*    |              | .08*    |              | .07     |              |
| Negative Affect  | -       |              | .07     |              | .07     |              | .06     |              |
| LPxNA            | -       |              | -       |              | -.01    |              | .00     |              |
| Negative Urgency | -       |              | -       |              | -       |              | .03     |              |
| Wave 4 → Wave 5  |         |              |         |              |         |              |         |              |
|                  | Step 1  |              | Step 2  |              | Step 3  |              | Step 4  |              |
|                  | $\beta$ | $\Delta R^2$ |
| Drinking         | .53**   | .28**        | .50**   | .01**        | .50**   | .00          | .47**   | .02**        |
| Lack of Planning | -       |              | .09*    |              | .09*    |              | .05     |              |
| Negative Affect  | -       |              | .06     |              | .06     |              | .01     |              |
| LPxNA            | -       |              | -       |              | .02     |              | .03     |              |
| Negative Urgency | -       |              | -       |              | -       |              | .16**   |              |
| Wave 5 → Wave 6  |         |              |         |              |         |              |         |              |
|                  | Step 1  |              | Step 2  |              | Step 3  |              | Step 4  |              |
|                  | $\beta$ | $\Delta R^2$ |
| Drinking         | .52**   | .28**        | .48**   | .02          | .48**   | .00          | .45**   | .01**        |
| Lack of Planning | -       |              | .09*    |              | .09*    |              | .07     |              |
| Negative Affect  | -       |              | .09*    |              | .09*    |              | .06     |              |
| LPxNA            | -       |              | -       |              | -.04    |              | -.02    |              |
| Negative Urgency | -       |              | -       |              | -       |              | .13**   |              |

| Wave 6 → Wave 7  |         |              |         |              |         |              |         |              |
|------------------|---------|--------------|---------|--------------|---------|--------------|---------|--------------|
|                  | Step 1  |              | Step 2  |              | Step 3  |              | Step 4  |              |
|                  | $\beta$ | $\Delta R^2$ |
| Drinking         | .53**   | .28**        | .50**   | .02**        | .50**   | .00          | .48**   | .01          |
| Lack of Planning | -       |              | .13**   |              | .13**   |              | .11**   |              |
| Negative Affect  | -       |              | .00     |              | .00     |              | -.03    |              |
| LPxNA            | -       |              | -       |              | -.01    |              | .00     |              |
| Negative Urgency | -       |              | -       |              | -       |              | .08     |              |
| Wave 7 → Wave 8  |         |              |         |              |         |              |         |              |
|                  | Step 1  |              | Step 2  |              | Step 3  |              | Step 4  |              |
|                  | $\beta$ | $\Delta R^2$ |
| Drinking         | .39**   | .15**        | .35**   | .03**        | .35**   | .00          | .32**   | .02**        |
| Lack of Planning | -       |              | .18**   |              | .18**   |              | .16**   |              |
| Negative Affect  | -       |              | .03     |              | .03     |              | -.01    |              |
| LPxNA            | -       |              | -       |              | -.03    |              | -.01    |              |
| Negative Urgency | -       |              | -       |              | -       |              | .15**   |              |

Table S8. Summary of Hierarchical Regression for Positive Urgency versus LPxPA predicting drinking for Boys (N=956)

| Wave 1 → Wave 2  |         |              |         |              |         |              |         |              |
|------------------|---------|--------------|---------|--------------|---------|--------------|---------|--------------|
|                  | Step 1  |              | Step 2  |              | Step 3  |              | Step 4  |              |
|                  | $\beta$ | $\Delta R^2$ |
| Drinking         | .42**   | .18**        | .40**   | .01          | .40**   | .00          | .40**   | .00          |
| Lack of Planning | -       |              | .08     |              | .08     |              | .07     |              |
| Positive Affect  | -       |              | -.02    |              | -.02    |              | -.02    |              |
| LPxPA            | -       |              | -       |              | -.02    |              | -.02    |              |
| Positive Urgency | -       |              | -       |              | -       |              | .04     |              |
| Wave 2 → Wave 3  |         |              |         |              |         |              |         |              |
|                  | Step 1  |              | Step 2  |              | Step 3  |              | Step 4  |              |
|                  | $\beta$ | $\Delta R^2$ |
| Drinking         | .38**   | .15**        | .38**   | .01          | .38**   | .00          | .37**   | .00          |
| Lack of Planning | -       |              | .07     |              | .07     |              | .05     |              |
| Positive Affect  | -       |              | -.01    |              | -.01    |              | -.02    |              |
| LPxPA            | -       |              | -       |              | .02     |              | .02     |              |
| Positive Urgency | -       |              | -       |              | -       |              | .05     |              |
| Wave 3 → Wave 4  |         |              |         |              |         |              |         |              |
|                  | Step 1  |              | Step 2  |              | Step 3  |              | Step 4  |              |
|                  | $\beta$ | $\Delta R^2$ |
| Drinking         | .55**   | .30**        | .53**   | .01**        | .53**   | .00          | .53**   | .00          |
| Lack of Planning | -       |              | .06     |              | .06     |              | .05     |              |
| Positive Affect  | -       |              | -.08*   |              | -.07*   |              | -.08*   |              |
| LPxPA            | -       |              | -       |              | -.06    |              | -.06    |              |
| Positive Urgency | -       |              | -       |              | -       |              | .02     |              |
| Wave 4 → Wave 5  |         |              |         |              |         |              |         |              |
|                  | Step 1  |              | Step 2  |              | Step 3  |              | Step 4  |              |
|                  | $\beta$ | $\Delta R^2$ |
| Drinking         | .64**   | .41**        | .63**   | .01**        | .63**   | .00          | .63**   | .00          |
| Lack of Planning | -       |              | .09**   |              | .09**   |              | .08*    |              |
| Positive Affect  | -       |              | .07*    |              | .07*    |              | .07*    |              |
| LPxPA            | -       |              | -       |              | .03     |              | .03     |              |
| Positive Urgency | -       |              | -       |              | -       |              | .04     |              |
| Wave 5 → Wave 6  |         |              |         |              |         |              |         |              |
|                  | Step 1  |              | Step 2  |              | Step 3  |              | Step 4  |              |
|                  | $\beta$ | $\Delta R^2$ |
| Drinking         | .53**   | .29**        | .52**   | .01          | .52**   | .00          | .50**   | .01**        |
| Lack of Planning | -       |              | .07     |              | .07     |              | .04     |              |
| Positive Affect  | -       |              | .04     |              | .04     |              | .03     |              |
| LPxPA            | -       |              | -       |              | -.01    |              | -.01    |              |
| Positive Urgency | -       |              | -       |              | -       |              | .11**   |              |

| Wave 6 → Wave 7  |         |              |         |              |         |              |         |              |
|------------------|---------|--------------|---------|--------------|---------|--------------|---------|--------------|
|                  | Step 1  |              | Step 2  |              | Step 3  |              | Step 4  |              |
|                  | $\beta$ | $\Delta R^2$ |
| Drinking         | .61**   | .38**        | .60**   | .03**        | .60**   | .00          | .59**   | .00          |
| Lack of Planning | -       |              | .13**   |              | .13**   |              | .12**   |              |
| Positive Affect  | -       |              | .13**   |              | .13**   |              | .13**   |              |
| LPxPA            | -       |              | -       |              | -.03    |              | -.03    |              |
| Positive Urgency | -       |              | -       |              | -       |              | .05     |              |
| Wave 7 → Wave 8  |         |              |         |              |         |              |         |              |
|                  | Step 1  |              | Step 2  |              | Step 3  |              | Step 4  |              |
|                  | $\beta$ | $\Delta R^2$ |
| Drinking         | .56**   | .31**        | .53**   | .02**        | .53**   | .00          | .53     | .00          |
| Lack of Planning | -       |              | .13**   |              | .13**   |              | .13**   |              |
| Positive Affect  | -       |              | -.03    |              | -.02    |              | -.02    |              |
| LPxPA            | -       |              | -       |              | -.04    |              | -.03    |              |
| Positive Urgency | -       |              | -       |              | -       |              | .01     |              |

Note. \* =  $p < .01$ , \*\* =  $p < .001$ .

Table S9. Summary of Hierarchical Regression for Positive Urgency versus LPxPA predicting drinking for Girls (N=925)

| Wave 1 → Wave 2  |         |              |         |              |         |              |         |              |
|------------------|---------|--------------|---------|--------------|---------|--------------|---------|--------------|
|                  | Step 1  |              | Step 2  |              | Step 3  |              | Step 4  |              |
|                  | $\beta$ | $\Delta R^2$ |
| Drinking         | .46**   | .21**        | .43**   | .02**        | .43**   | .00          | .42**   | .00          |
| Lack of Planning | -       |              | .11**   |              | .12**   |              | .10*    |              |
| Positive Affect  | -       |              | -.05    |              | -.05    |              | -.05    |              |
| LPxPA            | -       |              | -       |              | .02     |              | .02     |              |
| Positive Urgency | -       |              | -       |              | -       |              | .05     |              |
| Wave 2 → Wave 3  |         |              |         |              |         |              |         |              |
|                  | Step 1  |              | Step 2  |              | Step 3  |              | Step 4  |              |
|                  | $\beta$ | $\Delta R^2$ |
| Drinking         | .45**   | .20**        | .43**   | .01**        | .42**   | .00          | .40**   | .02**        |
| Lack of Planning | -       |              | .12**   |              | .12**   |              | .07     |              |
| Positive Affect  | -       |              | .07     |              | .07     |              | .06     |              |
| LPxPA            | -       |              | -       |              | .02     |              | -.01    |              |
| Positive Urgency | -       |              | -       |              | -       |              | .15**   |              |
| Wave 3 → Wave 4  |         |              |         |              |         |              |         |              |
|                  | Step 1  |              | Step 2  |              | Step 3  |              | Step 4  |              |
|                  | $\beta$ | $\Delta R^2$ |
| Drinking         | .53**   | .28**        | .51**   | .01**        | .51**   | .00          | .51**   | .00          |
| Lack of Planning | -       |              | .09*    |              | .09*    |              | .09*    |              |
| Positive Affect  | -       |              | -.05    |              | -.05    |              | -.05    |              |
| LPxPA            | -       |              | -       |              | .01     |              | .01     |              |
| Positive Urgency | -       |              | -       |              | -       |              | .02     |              |
| Wave 4 → Wave 5  |         |              |         |              |         |              |         |              |
|                  | Step 1  |              | Step 2  |              | Step 3  |              | Step 4  |              |
|                  | $\beta$ | $\Delta R^2$ |
| Drinking         | .57**   | .32**        | .54**   | .01*         | .54**   | .00          | .63**   | .01*         |
| Lack of Planning | -       |              | .10**   |              | .10**   |              | .08*    |              |
| Positive Affect  | -       |              | .00     |              | .00     |              | .00     |              |
| LPxPA            | -       |              | -       |              | -.03    |              | -.04    |              |
| Positive Urgency | -       |              | -       |              | -       |              | .08*    |              |
| Wave 5 → Wave 6  |         |              |         |              |         |              |         |              |
|                  | Step 1  |              | Step 2  |              | Step 3  |              | Step 4  |              |
|                  | $\beta$ | $\Delta R^2$ |
| Drinking         | .57**   | .33**        | .56**   | .00          | .56**   | .00          | .54**   | .01*         |
| Lack of Planning | -       |              | .05     |              | .05     |              | .04     |              |
| Positive Affect  | -       |              | .01     |              | .01     |              | .00     |              |
| LPxPA            | -       |              | -       |              | .00     |              | -.01    |              |
| Positive Urgency | -       |              | -       |              | -       |              | .09*    |              |

| Wave 6 → Wave 7  |         |              |         |              |         |              |         |              |
|------------------|---------|--------------|---------|--------------|---------|--------------|---------|--------------|
|                  | Step 1  |              | Step 2  |              | Step 3  |              | Step 4  |              |
|                  | $\beta$ | $\Delta R^2$ |
| Drinking         | .54**   | .29**        | .651**  | .02**        | .51**   | .00          | .50**   | .00          |
| Lack of Planning | -       |              | .14**   |              | .14**   |              |         |              |
| Positive Affect  | -       |              | .08*    |              | .09*    |              |         |              |
| LPxPA            | -       |              | -       |              | .06     |              |         |              |
| Positive Urgency | -       |              | -       |              | -       |              |         |              |
| Wave 7 → Wave 8  |         |              |         |              |         |              |         |              |
|                  | Step 1  |              | Step 2  |              | Step 3  |              | Step 4  |              |
|                  | $\beta$ | $\Delta R^2$ |
| Drinking         | .47**   | .22**        | .44**   | .02**        | .44**   | .00          | .42**   | .01*         |
| Lack of Planning | -       |              | .16**   |              | .16**   |              |         |              |
| Positive Affect  | -       |              | .04     |              | .04     |              |         |              |
| LPxPA            | -       |              | -       |              | -.02    |              |         |              |
| Positive Urgency | -       |              | -       |              | -       |              |         |              |

Note. \* =  $p < .01$ , \*\* =  $p < .001$ .
